# Supplementary material for: Novel zirconium complexes of amine bis(phenolate) ligands. Remarkable reactivity in polymerization of hex-1-ene due to an extra donor arm
Source: Royal Society of Chemistry journal article supplement (doi:10.1039/b000396o), 2000-01-01
Supplement: b000396o.doc [file b000396o.doc]

*Selected spectroscopic data* : 1H NMR (C6D6, unless otherwise stated) **1**: ** 9.86 (s, 2H, O*H*); 7.50 (d, *J* = 2.3Hz, 2H); 6.98 (d, *J* = 2.3Hz, 2H); 3.39 (s, 4H, C*H*2); 2.19 (m, 2H, C*H*2); 1.93 (s, 6H N(C*H*3)2); 1.67 (s, 18H, C(C*H*3)3); 1.34 (s, 18H, C(C*H*3)3). **2**: ** 7.74 (d, J = 7.1Hz, 2H); 7.62 (d, J = 2.4Hz, 2H); 7.39 (t, J = 8.1Hz, 2H); 7.05 (t, J = 7.3Hz, 1H); 6.95 (d, J = 2.4Hz, 2H); 6.90 (d, J = 7.1Hz, 2H); 6.73 (t, J = 8.0Hz, 2H); 6.55 (t, J = 7.3Hz, 1H); 3.45 (br d, J = 13.0Hz, 2H, C*H*2); 2.70 (s, 2H, PhC*H*2); 2.60 (d, J = 13.6Hz, 2H, C*H*2); 2.57 (s, 2H, PhC*H*2); 1.88 (s, 18H, C*H*3); 1.48 (s, 6H. N(C*H*3)2); 1.40 (br, 4H, C*H*2); 1.36 (s, 18H, C*H*3). **3**: ** 8.21 (s, 2H, O*H*); 7.48 (d, *J* = 2.3Hz, 2H); 6.97 (d, *J* = 2.3Hz, 2H); 3.37 (s, 4H, C*H*2); 2.19 (t, *J* = 7.1Hz, 2H, C*H*2); 1.62 (s, 18H, C(C*H*3)3); 1.34 (s, 18H, C(C*H*3)3); 1.26 (m, 2H, C*H*2); 0.57 (t, *J* = 7.3Hz, 3H, C*H*3). **4**: ** 7.76 (d, J = 7.5Hz, 2H); 7.57 (d, J = 2.3Hz, 2H); 7.28 (t, J = 7.6Hz, 2H); 7.12 (t, J = 7.3Hz, 1H); 6.94 (d, J = 2.3Hz, 2H); 6.92 (d, J = 7.4Hz, 2H); 6.74 (t, J = 7.4Hz, 2H); 6.62 (t, J = 7.3Hz, 1H); 3.30 (d, J = 13.8Hz, 2H, C*H*2); 2.99 (s, 2H, PhC*H*2); 2.98 (d, J = 13.6Hz, 2H, C*H*2); 2.03 (m, 2H, C*H*2); 1.95 (s, 2H, PhC*H*2); 1.79 (s, 18H, C*H*3); 1.35 (s, 18H, C*H*3); 1.05 (m, 2H, C*H*2); -0.03 (t, J = 7.3Hz, 3H, C*H*3). **Poly(1-hexene)** (CDCl3): ** 1.23 (bs, 8H, C*H*2); 1.06 (bs, 1H, C*H*); 0.89 (t, *J* = 5.6Hz, 3H, C*H*3). 13C NMR **1** (CDCl3): ** 153.3, 140.1, 136.0, 124.8, 123.3, 121.6, 56.6 (Ar*C*H2N); 56.9 (N*C*H2); 49.0 (N*C*H2); 44.8 (N(*C*H3)2); 35.0 (*C*-C); 34.0 (*C*-C); 31.7 (*C*H3); 29.5 (*C*H3). **2** (C6D6): ** 158.2, 149.3, 147.2, 141.3, 136.5, 129.1, 128.4, 128.3, 127.5, 125.2, 124.8 122.5, 120.4, 68.1 (Ph*C*H2); 66.1 (Ph*C*H2); 65.2 (Ar*C*H2N); 60.2 (N*C*H2); 51.2 (N*C*H2); 47.5 (N(*C*H3)2); 35.7 (*C*-C); 34.4 (*C*-C); 32.0 (*C*H3); 30.8 (*C*H3). **3** (CDCl3): ** 152.4, 141.5, 136.0, 125.0, 123.4, 121.7, 57.2 (Ar*C*H2N); 55.5 (N*C*H2); 34.8 (*C*-C); 34.2 (*C*-C); 31.6 (*C*H3); 29.7 (*C*H3); 19.4 (*C*H2); 11.7 (*C*H3). **4** (C6D6): ** 158.3, 148.3, 142.1, 137.4, 136.8, 131.4, 129.5, 125.8, 125.4, 125.2, 125.1, 122.7, 60.9 (Ar*C*H2N, N*C*H2); 58.9 (Ph*C*H2); 45.5 (Ph*C*H2); 36.1 (*C*-C); 35.0 (*C*-C); 32.6 (*C*H3); 31.3 (*C*H3); 14.0 (*C*H2); 11.2 (*C*H3). **Poly(1-hexene)** (CDCl3): ** 40.95 (br, *C*H2); 35.04 (br, *C*H2); 32.99 (*C*H); 29.39 (*C*H2); 29.03 (*C*H2); 24.01 (*C*H2); 14.94 (*C*H3).
